# Supplementary material for: Genetic Insights into the Extremely Dwarf Hibiscus syriacus var. micranthus: Complete Chloroplast Genome Analysis and Development of a Novel dCAPS Marker
Source: MDPI journal article supplement (doi:10.3390/cimb46030173), 2024-03-21
Supplement: s1 [file s1]

**Table S1.** Individual-specific variant distribution (unit: bp).

| Name       | Number of<br>substitutions | Number<br>of<br>insertions | Number<br>of<br>deletions | Number<br>of total<br>variants |
|------------|----------------------------|----------------------------|---------------------------|--------------------------------|
| HS N.M.520 | 2                          | 5                          | 10                        | 17                             |
| HSVM       | 1                          | 3                          | 0                         | 4                              |
| HS N.M.521 | 0                          | 1                          | 0                         | 1                              |
| HS 'Tamra' | 44                         | 150                        | 268                       | 462                            |
